# TABLE OF CONTENTS

# ANESTHESIOLOGY

Volume 137  
Issue 3  
September 2022

**This Month in ANESTHESIOLOGY .....A1**  
**Science, Medicine, and the Anesthesiologist.....A11**  
**Infographics in Anesthesiology .....A15**  
**Editorial**

**The Promise and Challenges of Predictive Analytics in Perioperative Care**  
*D. N. Wijeyesundera, D. I. McIsaac, M. J. London .....275*

**How to Stop the Unknowing Citation of Retracted Papers**  
*A. Marcus, A. J. Abritis, I. Oransky.....280*

### Special Article

◆ ◆ Performance of the Hypotension Prediction Index May Be Overestimated Due to Selection Bias  
*J. Enevoldsen, S. T. Vistisen .....283*

Limitations related to selection bias may significantly influence predictive indices of the proprietary Hypotension Prediction Index. *SUPPLEMENTAL DIGITAL CONTENT IS AVAILABLE IN THE TEXT*

### Readers' Toolbox

◆ Brain Complexities and Anesthesia: Their Meaning and Measurement  
*D. Li, M. S. Fabus, J. W. Sleigh.....290*

Anesthesia alters brain complexity, but there are many possible different approaches to measuring complexity. This toolbox describes the concepts behind, and application of, these measures. *SUPPLEMENTAL DIGITAL CONTENT IS AVAILABLE IN THE TEXT*

### Perioperative Medicine

#### CLINICAL SCIENCE

◆ Perioperative Neurofilament Light Plasma Concentrations and Cognition before and after Cardiac Surgery: A Prospective Nested Cohort Study  
*C. H. Brown IV, A. Lewis, J. Probert, M. Parish, J. Tian, K. Mandal, A. Everett, E. Colantuoni, V. Kamath, C. Hogue, A. Moghekar.....303*

In an observational study of 167 cardiac surgery patients nested within a randomized controlled study of blood pressure management, higher baseline neurofilament light concentration in blood is associated with worse baseline cognition, but improvement in cognition at 1 yr. An increase in neurofilament light on postoperative day 1 is associated with a greater decline in cognition at 1 yr. *SUPPLEMENTAL DIGITAL CONTENT IS AVAILABLE IN THE TEXT*

◆ Volatile versus Propofol General Anesthesia and Long-term Survival after Breast Cancer Surgery: A National Registry Retrospective Cohort Study  
*M. Enlund, A. Berglund, A. Enlund, L. Bergkvist.....315*

Using data combining two national Swedish clinical registries from 2013 to 2019 for 18,674 breast cancer surgery patients, the authors observed that 13,873 (74.3%) received propofol general anesthesia and 4,801 (25.7%) received inhaled volatile general anesthesia. In a propensity score-matched cohort of 9,316 patients, there was no difference in overall survival between patients receiving propofol general anesthesia (4,284 of 4,658; 92.0%) versus inhaled volatile general anesthesia (4,288 of 4,658; 92.1%). *SUPPLEMENTAL DIGITAL CONTENT IS AVAILABLE IN THE TEXT*

### Critical Care Medicine

#### CLINICAL SCIENCE

◆ Early Physiologic Effects of Prone Positioning in COVID-19 Acute Respiratory Distress Syndrome  
*F. Zarantonello, N. Sella, T. Pettenuzzo, G. Andreatta, A. Calore, D. Dotto, A. De Cassai, F. Calabrese, A. Boscolo, P. Navalesi .....327*

Using electrical impedance tomography, the authors assessed the percent variation of ventilation-perfusion matching before and after 90 min of the first cycle of prone positioning in 30 intubated, sedated, and paralyzed adult COVID-19 acute respiratory distress syndrome patients along with additional secondary pulmonary physiologic endpoints. Overall, prone positioning improved ventilation-perfusion matching significantly with a median difference of 8% with no change in dorsal perfusion. Lung overdistention was also significantly reduced. Pao<sub>2</sub>/fraction of inspired

◆ Refers to This Month in ANESTHESIOLOGY

◆ Refers to Editorial

◆ This article has an Audio Podcast

◆ See Supplemental Digital Content

◆ CME Article

◆ This article has a Video Abstract

◆ Readers' Toolbox

◆ This article has a Visual Abstract

◆ This article is Open Access

OPEN

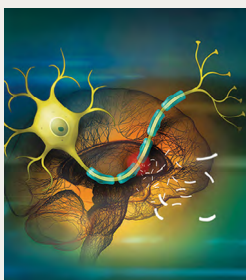

**ON THE COVER:** Postoperative increases in neurofilament light have been associated with delirium after non-cardiac surgery; however, few studies have examined this association in cardiac surgery patients. In this issue of ANESTHESIOLOGY, Brown *et al.* tested the hypothesis that increased neurofilament light would be associated with worse neuropsychological status after cardiac surgery. Cover illustration: A. Johnson, Vivo Visuals Studio.

• Brown *et al.*: Perioperative Neurofilament Light Plasma Concentrations and Cognition before and after Cardiac Surgery: A Prospective Nested Cohort Study, p. 303–14

oxygen improved overall, although 30% of the cohort were classified as nonresponders (less than 20% increase from baseline). *SUPPLEMENTAL DIGITAL CONTENT IS AVAILABLE IN THE TEXT*

## Education

### IMAGES IN ANESTHESIOLOGY

**Excessive Dynamic Airway Collapse with Induction of Anesthesia**  
*E. L. Sturgill, S. A. Malamet, J. D. McCarron, C. W. McLaughlin*.....340

### ORIGINAL INVESTIGATION IN EDUCATION

  **Inappropriate Citation of Retracted Articles in Anesthesiology and Intensive Care Medicine Publications**  
*A. De Cassai, F. Geraldini, S. De Pinto, I. Carbonari, M. Cascella, A. Boscolo, N. Sella, F. Monteleone, F. Cavaliere, M. Munari, E. Garofalo, P. Navalesi*.....341

The Retraction Watch database was used to identify 478 retracted anesthesiology and critical care medicine articles, 220 (46%) of which were cited at least once after retraction. A survey was sent to 417 of the corresponding authors of the articles citing retracted articles (30% of 1,402 such articles) who could be contacted and agreed to participate in a survey designed to determine reasons for citation of retracted articles. Most of the corresponding authors (n = 372, 89%) were unaware that they had cited a retracted article largely because of missed identification of the retraction status in the journals or search database (n = 229, 62%) and use of a stored copy of the article (n = 42, 11%). *SUPPLEMENTAL DIGITAL CONTENT IS AVAILABLE IN THE TEXT*

### CLINICAL FOCUS REVIEW

 **Aortic Biomechanics and Clinical Applications**  
*A. J. Gregory, E. S. Di Martino, P. W. M. Fedak, G. M. Dobson* .....351

The aorta contributes to cardiovascular physiology and function. Understanding biomechanics in health, disease, and after aortic interventions will facilitate optimization of perioperative patient care.

## MIND TO MIND

**Q&A in the OR**  
*N. J. Brown*.....364

**After Dying Alone: The Restorative Power of Narrative Practice**  
*K. B. Kirkland, A. Price*.....366

## CORRESPONDENCE

**Self-reported Race/Ethnicity and Occult Hypoxemia: Comment**  
*J. M. Rosenbloom*.....370

**Self-reported Race/Ethnicity and Occult Hypoxemia: Reply**  
*G. W. Burnett, B. Stannard, D. B. Wax, H.-M. Lin, C. Pyram-Vincent, S. DeMaria, M. A. Levin*.....371

**Point-of-Care Ultrasound Frailty Assessments: Comment**  
*Y. Raveh, D. Raveh, R. Nicolau-Raducu*.....372

**Point-of-Care Ultrasound Frailty Assessments: Comment**  
*E. Ben-Menachem, C. Ashes*.....373

**Point-of-Care Ultrasound Frailty Assessments: Reply**  
*C. Canales, T. R. Grogan, M. Cannesson, S. P. Singh*.....374

## Reviews of Educational Material ..... 376

### Anesthesiology Reflections from the Wood Library-Museum

**Romancing the Elements: Ether as Solidly Platonic?**  
*M. L. Coleman and G. S. Bause*.....326

**Sertürner Isolates Morphine! And Eventually...Himself**  
*J. S. Moon*.....339

**Painless Surgery Did Not Mesmerize Robert Liston until Ether Caught His Eye**  
*M. L. Coleman*.....350

## Careers & Events .....A17

## INSTRUCTIONS FOR AUTHORS

The most recently updated version of the Instructions for Authors is available at [www.anesthesiology.org](http://www.anesthesiology.org). Please refer to the Instructions for the preparation of any material for submission to ANESTHESIOLOGY.

Manuscripts submitted for consideration for publication must be submitted in electronic format via Editorial Manager (<https://www.editorialmanager.com/aln>). Detailed directions for submission and the most recent version of the Instructions for Authors can be found on the Journal's Web site (<http://www.anesthesiology.org>). Books and educational materials for review should be sent to Alan Jay Schwartz, M.D., M.S.Ed., Director of Education, Department of Anesthesiology and Critical Care Medicine, The Children's Hospital of Philadelphia,

34th Street and Civic Center Blvd., Room 9327, Philadelphia, Pennsylvania 19104-4399. Article-specific permission requests are managed with Copyright Clearance Center's Rightslink service. Information can be accessed directly from articles on the journal Web site. More information is available at <http://anesthesiology.pubs.asahq.org/public/rightsandpermissions.aspx>. For questions about the Rightslink service, e-mail [customer-care@copyright.com](mailto:customer-care@copyright.com) or call 877-622-5543 (U.S. only) or 978-777-9929. Advertising and related correspondence should be addressed to Advertising Manager, ANESTHESIOLOGY, Wolters Kluwer Health, Inc., Two Commerce Square, 2001 Market Street, Philadelphia, Pennsylvania 19103 (Web site: <http://www.wkad-center.com/>). Publication of an advertisement in an ASA publication or on an ASA website does not constitute endorsement or evaluation by ASA or by ASA's publishing partners of the product or service described therein or of any representations or claims made by the advertiser with respect to the product or service.

**ANESTHESIOLOGY** (ISSN 0003-3022) is published monthly by Wolters Kluwer Health, Inc., 1800 Dual Highway, Suite 201, Hagerstown, MD 21740-6636. Business office: Two Commerce Square, 2001 Market Street, Philadelphia, PA 19103. Periodicals postage paid at Hagerstown, MD, and at additional mailing offices. Copyright © 2022, the American Society of Anesthesiologists. All Rights Reserved.

**Annual Subscription Rates:** *United States*—\$1125 Individual, \$2904 Institution, \$442 In-training. *Rest of World*—\$1186 Individual, \$3224 Institution, \$442 In-training. Single copy rate \$288. Subscriptions outside of North America must add \$58 for airfreight delivery. Add state sales tax, where applicable. The GST tax of 7% must be added to all orders shipped to Canada (Wolters Kluwer Health, Inc.'s GST Identification #895524239, Publications Mail Agreement #1119672). Indicate in-training status and name of institution. Institution rates apply to libraries, hospitals, corporations, and partnerships of three or more individuals. Subscription prices outside the United States must be prepaid. Prices subject to change without notice. Subscriptions will begin with currently available issue unless otherwise requested. Visit us online at [www.lww.com](http://www.lww.com).

Individual and in-training subscription rates include print and access to the online version. Online-only subscriptions for individuals (\$372) and persons in training (\$372) are available to nonmembers and may be ordered by downloading a copy of the Online Subscription FAXback Form from the Web site, completing the information requested, and faxing the completed form to 301-223-2400. Institutional rates are for print only; online subscriptions are available via Ovid. Institutions can choose to purchase a print and online subscription together for a discounted rate. Institutions that wish to purchase a print subscription, please contact Wolters Kluwer Health,

Inc., 1800 Dual Highway, Suite 201, Hagerstown, MD 21740-6636; phone: 800-638-3030; fax: 301-223-2400. Institutions that wish to purchase an online subscription or online with print, please contact the Ovid Regional Sales Office near you or visit [www.ovid.com/site/index.jsp](http://www.ovid.com/site/index.jsp) and select Contact and Locations.

**Address for non-member subscription information, orders, or change of address:** Wolters Kluwer Health, Inc., 1800 Dual Highway, Suite 201, Hagerstown, MD 21740-6636; phone: 800-638-3030; fax: 301-223-2400.

**Address for member subscription information, orders, or change of address:** Members of the American Society of Anesthesiologists receive the print and online journal with their membership. To become a member or provide a change of address, please contact the American Society of Anesthesiologists, 1061 American Lane, Schaumburg, Illinois 60173-4973; phone: 847-825-5586; fax: 847-825-1692; e-mail: [membership@ASAhq.org](mailto:membership@ASAhq.org). For all other membership inquiries, contact Wolters Kluwer Health, Inc., Customer Service Department, P.O. Box 1610, Hagerstown, MD 21740; phone: 800-638-3030; fax: 301-223-2400.

**Postmaster:** Send address changes to ANESTHESIOLOGY, P.O. BOX 1610, Hagerstown, MD 21740.

**Advertising:** Please contact Angie Clements, National Account Manager, Health Learning, Research & Practice, Medical Journals, Wolters Kluwer Health, Inc.; phone: 501-502-8152; e-mail: [Angie.Clements@wolterskluwer.com](mailto:Angie.Clements@wolterskluwer.com). For classified advertising: Dave Wiegand, Recruitment Advertising Representative, Wolters Kluwer Health, Inc.; phone: 847-361-6128; e-mail: [Dave.Wiegand@wolterskluwer.com](mailto:Dave.Wiegand@wolterskluwer.com).
